# Supplementary material
Source: publisher figshare collection journal article supplement (https://geolsoc.figshare.com/ndownloader/files/5425103)
Supplement: Supplementary file 1 [file 5425103]

Mode	Sample ID	Units	Easting	Northing	Datum	Fe pXRF	Fe SD pXRF	Fe Fus	K pXRF	K SD pXRF	K Fus	Si pXRF	Si SD pXRF	Si Fus	Ti pXRF	Ti SD pXRF	Ti Fus
Mining Plus	07-MPB-006	%	703163	5242928	NAD27	5.0462	0.1046	4.5813	7.1871	0.2333	2.8806	22.1500	0.8136	28.7568	0.4989	0.0256	0.6115
Mining Plus	07-MPB-008	%	702853	5242639	NAD27	5.5746	0.2940	5.3926	5.4824	0.1552	2.1667	21.7733	0.3787	27.4948	0.4755	0.0077	0.6235
Mining Plus	07-MPB-009	%	702845	5242668	NAD27	6.7651	0.1542	6.6446	8.1029	0.1012	3.0632	21.0100	0.1852	25.2370	0.4703	0.0199	0.5096
Mining Plus	07-MPB-010	%	702834	5242696	NAD27	5.6716	0.0977	5.1548	5.2956	0.1441	2.0090	23.6900	0.1778	28.4670	0.4930	0.0129	0.5875
Mining Plus	07-MPB-013	%	702815	5242728	NAD27	9.8675	0.2271	8.4142	7.3486	0.1226	2.7727	22.0800	0.2551	25.8541	0.5663	0.0227	0.7494
Mining Plus	07-MPB-014	%	702794	5242754	NAD27	5.0777	0.0207	5.1478	8.8658	0.0636	3.2044	20.8467	0.2178	26.5973	0.4417	0.0054	0.5875
Mining Plus	07-MPB-015	%	702698	5242729	NAD27	5.7070	0.0241	4.8261	6.0613	0.0329	2.0339	25.3267	0.3147	29.1121	0.5610	0.0057	0.6535
Mining Plus	07-MPB-016	%	702805	5242698	NAD27	5.8953	0.2329	5.1198	5.4356	0.0949	1.8346	23.1533	0.7880	27.4340	0.4814	0.0145	0.5935
Mining Plus	07-MPB-017	%	702805	5242650	NAD27	6.5044	0.1410	5.5535	7.5638	0.0682	2.6482	22.8433	0.1159	27.2470	0.4351	0.0036	0.5635
Mining Plus	07-MPB-018	%	702816	5242620	NAD27	6.0790	0.1313	6.1760	7.7283	0.0951	2.8723	20.8567	0.1721	26.4056	0.4791	0.0137	0.6535
Mining Plus	07-MPB-019	%	702887	5242653	NAD27	6.4511	0.2078	6.5957	7.8516	0.0419	3.2791	21.4667	0.3332	25.7091	0.5081	0.0161	0.6055
Mining Plus	07-MPB-020	%	702841	5242565	NAD27	8.3017	0.2745	7.7427	12.7797	0.1134	5.7114	16.9367	0.1779	22.3483	0.5641	0.0116	0.8213
Mining Plus	07-MPB-021	%	702869	5242607	NAD27	7.4858	0.5110	6.4907	8.2292	0.0926	2.9636	20.9300	0.1510	28.2520	0.4003	0.0081	0.5755
Mining Plus	07-MPB-022	%	702655	5242679	NAD27	5.0334	0.1506	4.4624	6.4251	0.0781	2.3327	25.1267	0.0551	29.5001	0.5185	0.0080	0.5935
Mining Plus	07-MPB-023	%	702490	5242650	NAD27	15.3132	0.5906	10.3446	3.7762	0.1723	1.3033	25.2700	0.9027	28.5418	0.4361	0.0090	0.5935
Mining Plus	07-MPB-024	%	702536	5242525	NAD27	13.5171	0.3138	12.8696	5.8638	0.1243	2.3327	22.3200	0.2404	25.4941	0.6394	0.0358	0.9352
Mining Plus	07-MPB-025	%	702493	5242550	NAD27	8.4135	0.1704	7.3231	4.3406	0.0598	1.6271	25.1367	0.3972	28.3034	0.3655	0.0040	0.4137
Mining Plus	07-MPB-026	%	702497	5242505	NAD27	9.4456	0.2831	8.0155	7.0521	0.1726	2.4572	23.6600	0.5274	28.7288	0.5533	0.0029	0.7494
Mining Plus	07-MPB-027	%	702477	5242586	NAD27	4.8498	0.0681	4.4484	7.2849	0.1271	2.6150	24.5667	0.1380	30.2994	0.5174	0.0097	0.6355
Mining Plus	07-MPB-028	%	702470	5242447	NAD27	7.5135	0.2650	7.0363	6.0494	0.0418	2.1252	22.0033	0.3190	26.1298	0.4838	0.0059	0.6055
Mining Plus	07-MPB-029	%	702444	5242522	NAD27	4.8623	0.0453	4.4064	5.3440	0.0764	1.7765	27.7500	0.3342	32.1692	0.5651	0.0058	0.7074
Mining Plus	07-MPB-030	%	702490	5242650	NAD27	16.3830	0.4651	8.6870	3.9861	0.1384	1.4112	26.4967	0.5006	29.5234	0.4946	0.0310	0.6595
Mining Plus	07-MPB-031	%	702497	5242621	NAD27	13.6531	0.2975	11.6945	5.1967	0.1964	2.0173	20.6133	0.4080	24.7556	0.4991	0.0063	0.6655
Mining Plus	07-MPB-032	%	702603	5242596	NAD27	5.1124	0.1733	4.5673	7.5421	0.1474	2.6150	23.9867	0.5138	29.3224	0.5105	0.0192	0.6175
Mining Plus	07-MPB-033	%	702594	5242626	NAD27	15.4334	0.6116	10.6803	4.4431	0.1042	1.7516	23.4500	0.6129	28.0744	0.4120	0.0159	0.5935
Mining Plus	07-MPB-034	%	702573	5242649	NAD27	9.7180	0.2806	6.6166	4.4480	0.0334	1.5109	29.4467	0.1405	31.6690	0.5094	0.0125	0.6235
Mining Plus	07-MPB-035	%	702557	5242659	NAD27	5.9577	0.0614	4.7352	5.4784	0.0669	1.8429	26.3067	0.3485	31.2109	0.4988	0.0213	0.6355
Mining Plus	07-MPB-036	%	702660	5242561	NAD27	5.5074	0.0948	4.9800	6.9915	0.0981	2.5236	22.7100	0.1970	28.8644	0.5363	0.0107	0.6834
Mining Plus	07-MPB-037	%	702681	5242586	NAD27	5.1255	0.0183	4.3085	6.9793	0.0687	2.3244	24.1567	0.1644	30.9398	0.5264	0.0072	0.6355
Mining Plus	07-MPB-038	%	702696	5242599	NAD27	17.8907	0.6098	16.4157	6.7448	0.0880	3.0217	15.8467	0.1793	19.7119	0.5273	0.0095	0.9232
Mining Plus	07-MPB-039	%	702719	5242577	NAD27	6.2196	0.0976	5.0639	6.9530	0.1290	2.3825	25.5867	0.1914	30.4537	0.5640	0.0136	0.6714
Mining Plus	07-MPB-040	%	702574	5242570	NAD27	9.8472	0.0348	4.7352	6.5882	0.0778	2.6233	20.6467	0.2774	28.5185	0.4400	0.0066	0.6235
Mining Plus	07-MPB-041	%	703153	5242815	NAD27	5.2226	0.0325	4.6372	8.4508	0.0716	2.9470	22.9967	0.1102	28.3081	0.5268	0.0189	0.6055
Mining Plus	07-MPB-042	%	703165	5242729	NAD27	5.9165	0.0891	5.1268	6.4018	0.0610	2.2995	23.8033	0.2639	29.2196	0.5639	0.0068	0.6894
Mining Plus	07-MPB-043	%	703156	5242614	NAD27	4.6145	0.0744	4.1966	6.7978	0.0877	2.2497	24.7367	0.6558	31.9915	0.5581	0.0235	0.7374
Mining Plus	07-MPB-044	%	703142	5242450	NAD27	4.9554	0.0766	4.4204	6.5233	0.0347	2.1169	25.6433	0.7587	31.3324	0.5499	0.0113	0.7554
Mining Plus	07-MPB-045	%	703172	5242369	NAD27	4.8617	0.1038	4.4484	6.3329	0.1688	2.2497	24.6600	0.5188	29.7291	0.6117	0.0133	0.6894
Mining Plus	07-MPB-046	%	703149	5242535	NAD27	5.0210	0.0853	4.6582	5.1806	0.0510	1.7101	26.3233	0.0737	30.1545	0.5548	0.0071	0.7074
Mining Plus	07-MPB-047	%	703165	5242687	NAD27	6.2985	0.0451	5.7423	6.4897	0.1406	2.1833	24.3933	0.5029	28.6166	0.6168	0.0095	0.8153
Mining Plus	07-MPB-048	%	702719	5242615	NAD27	8.4444	0.0867	9.2325	9.0077	0.1149	4.2005	16.0467	0.2103	22.4044	0.6099	0.0042	0.8813
Mining Plus	07-MPB-049	%	702556	5242629	NAD27	5.6948	0.0938	4.7422	6.6793	0.0691	2.2165	24.5533	0.3302	30.5284	0.5143	0.0046	0.6475
Mining Plus	07-MPB-051	%	702752	5242575	NAD27	5.2860	0.1892	5.0779	7.4845	0.1277	2.6731	24.4300	0.1308	29.4300	0.5815	0.0181	0.6595
Mining Plus	07-MPB-052	%	702600	5242641	NAD27	7.4977	0.0447	4.9100	4.5419	0.0380	1.4445	27.7933	0.1762	31.9682	0.5555	0.0034	0.6595
Mining Plus	07-MPB-053	%	702556	5242629	NAD27	5.3329	0.1369	4.6652	6.0813	0.0430	2.2414	24.1067	0.3661	31.3137	0.5089	0.0168	0.6655
Mining Plus	07-MPB-054	%	702600	5242641	NAD27	6.8419	0.3967	4.7212	5.5731	0.0607	1.9176	27.6033	0.0416	31.4586	0.5425	0.0152	0.6954
Mining Plus	07-MPB-056	%	704246	5242214	NAD27	5.5178	0.2106	4.8681	4.5307	0.1077	1.7350	24.7600	0.1744	29.0467	0.5515	0.0122	0.7194
Mining Plus	07-MPB-057	%	704338	5241889	NAD27	5.6031	0.0307	5.1898	4.9272	0.1178	1.7599	23.3467	0.4479	27.9201	0.5409	0.0212	0.7014
